# Supplementary material for: Identification of Candidate Cancer Predisposing Genes by Whole-Exome Sequencing of Families at High-Risk of Glioma
Source: Preprints.org preprint supplement (doi:10.20944/preprints202202.0330.v1), 2022-02-25
Supplement: Supplementary file 1 [file supplementary]

**Supplementary Figure 1**. **Principal components analysis (PCA) plots of the population ancestry of cases and controls**. HapMap CEU individuals are plotted in blue circles, CHB+JPT are plotted in green circles, YRI individuals are plotted in red circles. Familial glioma cases, TCGA glioma cases and Controls are plotted as blue, orange and grey crosses respectively.


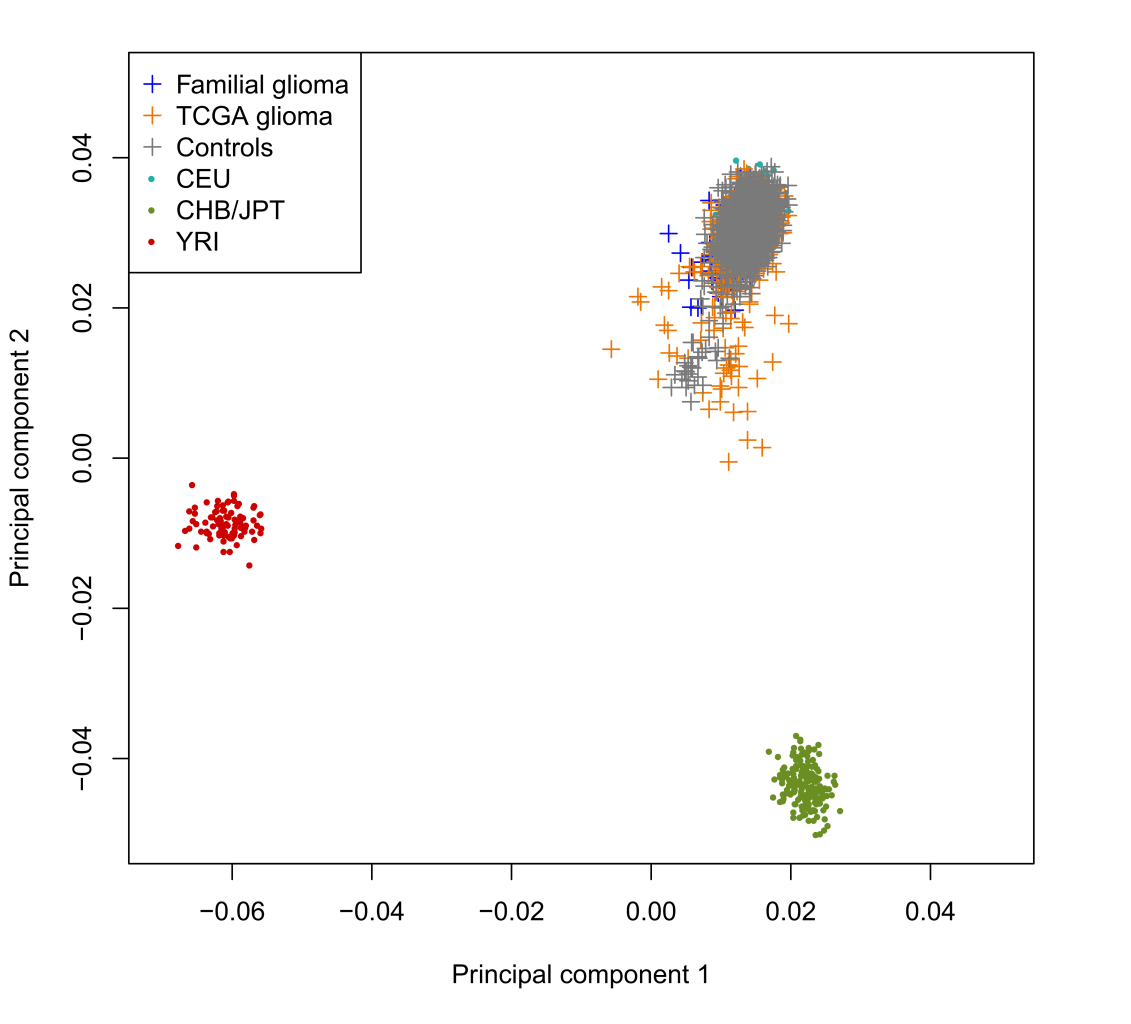


# Supplementary Table 1. Details of glioma cases sequenced. Shown for each family sequenced are the proband’s personal history of cancer and any known details of relatives affected with brain tumours.*, sample sequenced; M, Male; F, Female; Mo, Mother; Fa, Father; m, maternal; p, paternal; B, brother; S, sister; A, aunt; U, uncle; C, cousin; GMo, Grandmother; GFa, Grandfather; GU, Great uncle; GA, Great aunt; GNe, Grandnephew; Ne, Nephew; Ni, Niece; GGMo, Great grandmother; D, Daughter; So, Son; H, Half; Cr, First cousin once removed; Cd, Double cousin; C2, Second cousin.

| **Family** | **Centre** | **Proband - sex, histology (age of diagnosis)** | **Brain tumours in family - relation (sex), histology (age of diagnosis)** | **N** |
| --- | --- | --- | --- | --- |
| FAM_1 | French | M, Grade II astrocytoma (31)* | B (M), Grade III anaplastic astrocytoma (48)* | 2 |
| FAM_2 | French | F, Grade III anaplastic oligoastrocytoma (27**)*** | Fa (M), GBM (51)* | 2 |
| FAM_3 | French | M, GBM (61)* | B (M), GBM (65)*; S (F), Astrocytoma; B (M), PBT, Mo (M), GBM, mC (F), GBM | 2 |
| FAM_4 | French | M, Glioma medulla* | Mo (F), Anaplastic astrocytoma (61)*, mGMo (F), PBT | 2 |
| FAM_5 | French | M, GBM (44)* | mC (M), GBM* | 2 |
| FAM_6 | French | M, Grade II oligoastrocytoma (40)* | mC (M), glioma* | 2 |
| FAM_7 | French | M, Grade II oligodendroglioma (30)* | pU (M), GBM*; Mo, Grade II Meningioma (50) | 2 |
| FAM_8 | French | M, Grade III oligodendroglioma (46)* | B (M), Anaplastic oligoastrocytoma (56)/COAD*; B (M), head + neck | 2 |
| FAM_9 | French | M, Grade II oligodendroglioma (45)* | S (F), GBM* | 2 |
| FAM_10 | French | M, Brainstem glioma* | S (F), Grade II oligodendroglioma (41)*; B (M), Grade III oligodendroglioma | 2 |
| FAM_11 | French | M, Ganglioma (36)* | B (M), GBM (51)*; pGMo (F), PBT | 2 |
| FAM_12 | Danish | M, GBM (46)/Anaplastic astrocytoma (46) | fC (M), Anaplastic astrocytoma (58)* | 2 |
| FAM_13 | Danish | F, Dysembroplastic neuroepithelial tumour (27)/Glioma, unclassified (27)* | Mo (F), Diffuse astrocytoma (46)*; mGMo (F), PBT (21); mU (M), Medulloblastoma (13) | 2 |
| FAM_14 | Danish | F, Anaplastic oligodendroglioma (67)* | B (M), Anaplastic oligodendroglioma (63)*; mC (F), Breast (60)/Meningioma (62) | 2 |
| FAM_15 | Danish | F, BCC (75)/GBM (77)* | S (F), GBM (78)* | 2 |
| FAM_16 | Danish | M, GBM (73)* | S (F), Astrocytoma, juvenile pilocytic (41)*; mC (M), GBM (76)/Glioma unclassified*; mA (F), GBM (66); mU (M), PBT; mGNi (F), thyroid (40) | 3 |
| FAM_17 | Danish | F, Diffuse astrocytoma (24)* | S (F), Diffuse astrocytoma (26)* | 2 |
|  |  |  |  |  |
| FAM_18 | French | M, GBM* | B (M), GBM | 1 |
| FAM_19 | French | M, Grade III anaplastic oligoastrocytoma (55)* | U (M), PBT | 1 |
| FAM_20 | French | M, Grade III oligoastrocytoma (52)* | Mo (F), Brain-stem glioma | 1 |
| FAM_21 | French | M, Grade III oligodendroglioma (54)* | mA (F), PBT | 1 |
| FAM_22 | French | M, Oligodendroglioma* | Mo (F), GBM | 1 |
| FAM_23 | French | M, Grade III oligodendroglioma (44)* | S (F), PBT | 1 |
| FAM_24 | French | M, GBM (68)* | B (M), GBM | 1 |
| FAM_25 | French | M, GBM* | Mo (F), PBT | 1 |
| FAM_26 | French | M, Anaplastic oligoastrocytoma (31)* | GFa (M), Oligoastrocytoma/astrocytoma | 1 |
| FAM_27 | French | F, Melanoma-glioma* |  | 1 |
| FAM_28 | French | F, Grade II oligoastrocytoma* | S (F), Astrocytoma | 1 |
| FAM_29 | French | F, Malignant neural glioma (26)* | pGMo (F), Astrocytoma; GGMo, Probable brain tumour | 1 |
| FAM_30 | French | F, Anaplastic astrocytoma* | GA (F), PBT | 1 |
| FAM_31 | French | F, Grade III oligodendroglioma* | S (F), Thalamic tumour | 1 |
| FAM_32 | French | M, GBM* | S (F), PBT | 1 |
| FAM_33 | French | F, Grade III oligodendroglioma* | B (M), PBT; S (F), PBT | 1 |
| FAM_34 | French | F, GBM (65)* | Fa (M), PBT | 1 |
| FAM_35 | French | M, GBMO-melanoma* |  | 1 |
| FAM_36 | French | M, Grade III anaplastic astrocytoma (61)* | B (M), Grade III/IV gemistocytic astrocytoma | 1 |
| FAM_37 | French | F, GBM* | S (F), GBM; | 1 |
| FAM_38 | French | M, Grade II oligodendroglioma (54)* | pU (M), PBT | 1 |
| FAM_39 | French | M, Ganglioma (32)* | mGFa (M), PBT; mC (M), PBT | 1 |
| FAM_40 | French | F, Grade III oligodendroglioma (49)* | A (F), PBT | 1 |
| FAM_41 | French | F, GBM (51)* | B (M), Cerebral lymphoma | 1 |
| FAM_42 | French | M, Gemistocytic astrocytoma (28)* | Fa (M), Anaplastic astrocytoma (52); pA (F), PBT | 1 |
| FAM_43 | French | F, GBM (53)* | Mo (F), GBM | 1 |
| FAM_44 | French | M, Grade II oligodendroglioma (50)* | D (F), Medulloblastoma | 1 |
| FAM_45 | French | F, Grade III oligodendroglioma* | Mo (F), PBT | 1 |
| FAM_46 | French | F, GBMO-melanoma* |  | 1 |
| FAM_47 | French | M, GBM* | C (F), Glioma unspecified | 1 |
| FAM_48 | French | F, GBM (51)* | C (M), PBT; C (M), PBT | 1 |
| FAM_49 | French | F, Glioma unspecified (29)* | U (M), PBT | 1 |
| FAM_50 | French | M, Grade II astrocytoma (48)/colon cancer* | Suspected history of turcot syndrome | 1 |
| FAM_51 | French | F, Grade II astrocytoma (43)* | GFa (M), PBT | 1 |
| FAM_52 | French | F, GBM (50)/ breast (36)* | Fa (M), Malignant cerebellar astrocytoma (54) | 1 |
| FAM_53 | French | F, Grade III oligodendroglioma (27) | mU (M), Glioma unspecified | 1 |
| FAM_54 | French | F, GBMO-melanoma* |  | 1 |
| FAM_55 | French | F, Grade II oligoastrocytoma (72)/Thyroid adenocarcinoma* |  | 1 |
| FAM_56 | French | F, Gliomatosis cerebri-choroidal melanoma* |  | 1 |
| FAM_57 | French | M, Gliomatose astrocytoma grade II/III (21)* | Multiple PBTs in family | 1 |
| FAM_58 | French | F, GBM* | So (M), PBT | 1 |
| FAM_59 | French | F, Malignant glioma* | B (M), GBM/renal cancer | 1 |
| FAM_60 | French | F, GBM* | Mo (F), GBM | 1 |
| FAM_61 | French | F, Oligoastrocytoma (26)* | Mo (F), GBM | 1 |
| FAM_62 | French | M, Grade II ependymoma (27)* | Mo (F), Glioma unspecified; pU (M), PBT | 1 |
| FAM_63 | French | M, Grade II astrocytoma (54)* | C (M), PBT | 1 |
| FAM_64 | French | M, Oligoastrocytoma (35)* | Fa (M), Oligodendroglioma; B (M), Oligoastrocytoma (21) | 1 |
| FAM_65 | French | F, Grade II oligodendroglioma (50)* | B (M), Pilocytic astrocytoma | 1 |
| FAM_66 | French | F, Anaplastic oligodendroglioma* | C (M), PBT; A (F), PBT | 1 |
| FAM_67 | French | M, GBM (68)* | B (M), PBT | 1 |
| FAM_68 | French | M, Grade III anaplastic astrocytoma (57)* | Mo (F), PBT | 1 |
| FAM_69 | French | M, Grade III oligodendroglioma (76)* | Fa (M), PBT | 1 |
| FAM_70 | French | M, Anaplastic astrocytoma* | Fa (M), GBM; C (M), GBM | 1 |
| FAM_71 | French | M, GBM (34)* | mGFa (M), Glioma unspecified | 1 |
| FAM_72 | French | F, Oligoastrocytoma (30)* | Multiple PBTs | 1 |
| FAM_73 | French | F, GBM-melanoma* |  | 1 |
| FAM_74 | French | M, Grade III anaplastic astrocytoma (57)* | B (M), PBT (51) | 1 |
| FAM_75 | French | M, GBM* | B (M), GBM | 1 |
| FAM_76 | French | F, Grade III anaplastic oligoastrocytoma (37)* | Fa (M), GBM | 1 |
| FAM_77 | French | M, GBM-melanoma* |  | 1 |
| FAM_78 | French | F, Grade II oligodendroglioma-melanoma* |  | 1 |
| FAM_79 | French | F, Grade II oligoastrocytoma (48)* | S (F), PBT | 1 |
| FAM_80 | French | M, Grade III anaplastic astrocytoma (20)* | Fa (M), Glioma papilloma | 1 |
| FAM_81 | French | M, Gliosarcoma (71)* | F (M), GBM | 1 |
| FAM_82 | French | M, GBM (61)* | F (M), PBT | 1 |
| FAM_83 | French | M, Grade II astrocytoma/colorectal polyps* | C (M), PBT (40) | 1 |
| FAM_84 | French | M, GBM-melanoma* |  | 1 |
| FAM_85 | French | M, Grade II oligodendroglioma (47)* | B (M), PBT | 1 |
| FAM_86 | French | M, GBM with oligodendroglioma (32)* | C (M), Glioma unspecified | 1 |
| FAM_87 | French | F, Gemistocytic astrocytoma* | mGMo (F), GBM | 1 |
| FAM_88 | French | F, Grade II oligodendroglioma (38) / melanoma (34) | GFa (M), PBT | 1 |
| FAM_89 | French | M, Xanthoastrocytoma* | Mo (F), PBT | 1 |
| FAM_90 | French | F, GBM (48)* | mU (M), PBT | 1 |
| FAM_91 | French | M, GBM (56)* | Mo (F), PBT | 1 |
| FAM_92 | French | M, Glioma* | C (M), Oligodendroglioma (33); C (M), Medulloblastoma (11) | 1 |
| FAM_93 | French | F, GBM (67)* | B (M), GBM (49) | 1 |
| FAM_94 | French | M, GBM* | Fa (M), GBM | 1 |
| FAM_95 | French | M, Grade II oligodendroglioma (46)* | B (M), PBT, Mo (F), PBT | 1 |
| FAM_96 | French | M, Grade II oligodendroglioma-melanoma* |  | 1 |
| FAM_97 | French | M, GBM (51)* | B (M), PBT | 1 |
| FAM_98 | French | M, Grade II astrocytoma (37)* | Mo (F), PBT; A (F), PBT | 1 |
| FAM_99 | French | M, Anaplastic oligoastrocytoma* | Mo (F), PBT; mU (M), PBT | 1 |
| FAM_100 | French | F, Grade III oligodendroglioma (35)* | C (M), Grade II glioma | 1 |
| FAM_101 | French | M, GBM-melnoma* |  | 1 |
| FAM_102 | French | M, GBM (52)* | mGMo (F), GBM | 1 |
| FAM_103 | French | M, GBM (62)* | B (M), GBM | 1 |
| FAM_104 | French | M, Grade III anaplastic oligoastrytoma (40)* | Fa (M), PBT | 1 |
| FAM_105 | French | F, Anaplastic astrocytoma (30)* | Mo (F), GBM; pC (F), PBT | 1 |
| FAM_106 | French | M, GBM* | Ne (M), PBT | 1 |
| FAM_107 | French | M, GBM* | So (M), Anaplastic astrocytoma | 1 |
| FAM_108 | French | F, GBM (18)* | C (F), Cerebellar astrocytoma | 1 |
| FAM_109 | French | M, GBM* | Mo (F), GBM | 1 |
| FAM_110 | French | M, Anaplastic oligodendroglioma* | B (M), PBT | 1 |
| FAM_111 | French | M, Glioma* | U (M), Cerebellar tumour | 1 |
| FAM_112 | French | M, GBM (72)* | S (M), GBM | 1 |
| FAM_113 | French | M, GBM (58)* | Fa (M), PBT | 1 |
| FAM_114 | Danish | F, Diffuse astrocytoma (45, 50, 52)* | B (M), GBM (37) | 1 |
| FAM_115 | Danish | M, Diffuse astrocytoma (25)* | Fa (M), Oligodendroglioma (39, 42, 46); pHA (F), GBM (60) | 1 |
| FAM_116 | Danish | M, Anaplastic astrocytoma (58)* | Fa (M), Giant cell GBM (40) | 1 |
| FAM_117 | Danish | F, Diffuse astrocytoma (51)* | B (M), Diffuse astrocytoma (41) | 1 |
| FAM_118 | Danish | F, GBM (35)* | pGA (F), GBM (50) | 1 |
| FAM_119 | Danish | M, GBM (64)* | Fa (M), Oligodendroglioma (61) | 1 |
| FAM_120 | Danish | F, Thyroid (28)/GBM (47) | Fa (M), GBM (68) | 1 |
| FAM_121 | Danish | F, GBM (69)* | B (M), GBM (65); B (M), Eye (45); pA (F), BCC (77)/Melanoma (81)/PBT (88) | 1 |
| FAM_122 | Danish | F, Anaplastic oligoastrocytoma (55)* | So (M), Fibrillary astrocytoma (27)/Anaplastic astrocytoma (28); pGFa (M), PBT (48); mHC (M), Oligodendroglioma (42)/GBM (46); mHC (F), Meningioma (56) | 1 |
| FAM_123 | Danish | F, Diffuse astrocytoma (29)/Diffuse astrocytoma (32)/Anaplastic astrocytoma (35)* | pC (F), Diffuse astrocytoma (29); pGA (F), Oligoastrocytoma (68); pCr (M), GBM (37)/GBM (38) | 1 |
| FAM_124 | Danish | F, Anaplastic astrocytoma (57)* | S (F), GBM (45); Mo (F), Anaplastic astrocytoma (83) | 1 |
| FAM_125 | Danish | M, GBM (80)* | Fa (M), Oligodendroglioma (59); pC (F), Meningioma (59); pCr (M), Diffuse astrocytoma (46) | 1 |
| FAM_126 | Danish | M, Glioma unclassified (69)* | Mo (F), GBM (58) | 1 |
| FAM_127 | Danish | M, GBM (77)* | B (F), GBM (69); mA (F), Diffuse astrocytoma (73) | 1 |
| FAM_128 | Danish | F, GBM (53)* | Cd (M), Oligoastrocytoma (31), Anaplastic oligodendroglioma (34) | 1 |
| FAM_129 | Danish | M, Anaplastic oligoastrocytoma (43)* | mC (M), GBM (39) | 1 |
| FAM_130 | Danish | M, Oligodendroglioma (44)/oligodendroglioma (60)* | mGFa (F), Anaplastic oligodendroglioma (74) | 1 |
| FAM_131 | Danish | F, GBM (43)* | pGFa (M), GBM (58) | 1 |
| FAM_132 | Danish | F, Oligodendroglioma (38)/Oligodendroglioma (43)* | Fa (M), GBM (46) | 1 |
| FAM_133 | Danish | F, Spinal cord paraganglioma (51)* | Mo (F), GBM (63) | 1 |
| FAM_134 | Danish | F, GBM (53)* | pA (F), BCC (52)/GBM (71) | 1 |
| FAM_135 | Danish | M, GBM (42)* | mA (F), Pilocytic astrocytoma (30) | 1 |
| FAM_136 | Danish | M, GBM (60) | pU (M), Oligodendroglioma (60) | 1 |
| FAM_137 | Danish | M, GBM (43)/GBM (44)* | Fa (M), Fibrillary astrocytoma (25); mC2 (M), GBM (29); mCr (M), Diffuse astrocytoma (28) | 1 |
| FAM_138 | Danish | M, Anaplastic oligoastrocytoma (69)* | Fa (M), Diffuse astrocytoma (66) | 1 |
| FAM_139 | Danish | F, Anaplastic oligodendroglioma (41)* | S (F), Meningioma (40); pC (F), Adrenal (30)/ | 1 |
| FAM_140 | Danish | F, Ependymoma (51)* | Fa (M), GBM (63) | 1 |
| FAM_141 | Danish | M, Diffuse astrocytoma (32)/Gemistocytic astrocytoma (33)* | Mo (F), Anaplastic astrocytoma (33) | 1 |
| FAM_142 | Danish | M, Diffuse astrocytoma (37)* | S (F), Oligoastrocytoma (37)/Oligoastrocytoma (45)/Anaplastic oligodendroglioma (46) | 1 |
| FAM_143 | Danish | F, GBM (73)* | B (M), GBM (63) | 1 |
| FAM_144 | Danish | F, Diffuse astrocytoma (58)* | mA (F), GBM (F); mGU (M), Anaplastic oligodendroglioma (60) | 1 |
| FAM_145 | Danish | M, GBM (76)* | Fa (M), Glioma (57); pA (F), Thyroid (67)/Skin unknown (78) | 1 |
| FAM_146 | Danish | F, Glioma unclassified* | pC (M), GBM | 1 |
| FAM_147 | Danish | F, GBM (53)* | Fa (M), GBM | 1 |
| FAM_148 | Danish | F, GBM (63)* | Fa (M), GBM (64) | 1 |
| FAM_149 | Danish | M, GBM (56)/GBM (56) | HB (M), Oligodendroglioma (40) | 1 |
| FAM_150 | Danish | M, Anaplastic oligodendroglioma* | Fa (M), PBT; Mo (F), Meningioma | 1 |

Supplementary Table 2. Per-gene association analysis in glioma cases. The SKAT-O test was applied to protein altering variants (*Pnon-syn*) and synonymous variants (*P*synon).Shown are all genes with >1 protein altering variant and *Pnon-syn* <1x10-4.

| **Gene** | **Ensembl gene** | **N** | ***Pnon-syn*** | ***Psynon*** |
| --- | --- | --- | --- | --- |
| *AMT* | ENSG00000145020 | 8 | 2.21x10-5 | 0.070 |
| *HCP5* | ENSG00000206337 | 9 | 2.28 x10-5 | 1.00 |
| *MICA* | ENSG00000204520 | 9 | 2.28 x10-5 | 1.00 |
| *TBC1D21* | ENSG00000167139 | 3 | 3.55 x10-5 | 1.00 |
| *ZNF577* | ENSG00000161551 | 13 | 4.29 x10-5 | 1.00 |
| *UBD* | ENSG00000213886 | 5 | 4.80 x10-5 | 1.00 |
| *SEMA3A* | ENSG00000075213 | 19 | 4.98 x10-5 | 0.092 |
| *EQTN* | ENSG00000120160 | 8 | 5.60 x10-5 | - |
| *DPH1* | ENSG00000108963 | 6 | 5.63 x10-5 | 1.00 |
| *GABRA2* | ENSG00000151834 | 2 | 5.86 x10-5 | 0.404 |
| *TET2* | ENSG00000168769 | 21 | 6.00 x10-5 | 0.060 |
| *CCDC113* | ENSG00000103021 | 11 | 6.26 x10-5 | 1.00 |
| *RIMS2* | ENSG00000176406 | 20 | 6.62 x10-5 | 0.29 |
| *WDR19* | ENSG00000157796 | 23 | 7.00 x10-5 | 0.34 |
| *N4BP2L2* | ENSG00000244754 | 28 | 8.23 x10-5 | 0.55 |
| *PDK4* | ENSG00000004799 | 11 | 8.53 x10-5 | 0.064 |
| *ZNF804B* | ENSG00000182348 | 55 | 9.45 x10-5 | 0.053 |
| *ENPP2* | ENSG00000136960 | 17 | 9.67 x10-5 | 0.545 |
